# Supplementary material for: Solar water splitting over Rh0.5Cr1.5O3-loaded AgTaO3 of a valence-band-controlled metal oxide photocatalyst
Source: PubMed Central journal article supplement — Chem Sci. 2020 Jan 28;11(9):2330–4. doi: 10.1039/c9sc05909a (PMC7069506; doi:10.1039/c9sc05909a), 2020-01-28
Supplement: SC-011-C9SC05909A-s001.pdf [file SC-011-C9SC05909A-s001.pdf]

## Supporting Information

### **Solar water splitting over Rh<sub>0.5</sub>Cr<sub>1.5</sub>O<sub>3</sub>-loaded AgTaO<sub>3</sub> of a valence-band-controlled metal oxide photocatalyst**

Kenta Watanabe,<sup>a</sup> Akihide Iwase,<sup>a,b</sup> Akihiko Kudo<sup>\*a,b</sup>

<sup>a</sup>Department of Applied Chemistry, Faculty of Science, Tokyo University of Science, 1-3 Kagurazaka, Shinjuku-ku, Tokyo 162-8601, Japan

<sup>b</sup>Photocatalysis international Research Center, Research Institute for Science and Technology, Tokyo University of Science, 2641 Yamazaki Noda-shi, Chiba-ken 278-8510, Japan

**Table S1** Photocatalytic water splitting over  $\text{Rh}_{0.5}\text{Cr}_{1.5}\text{O}_3(0.3 \text{ wt}\%)/\text{AgTaO}_3$  synthesized by a solid state reaction with various excess amount of Ag under various calcination conditions under UV irradiation.

| Calcination condition |          | Excess Ag / mol% | Activity / $\mu\text{mol h}^{-1}$ |                |
|-----------------------|----------|------------------|-----------------------------------|----------------|
| Temperature / K       | Time / h |                  | H <sub>2</sub>                    | O <sub>2</sub> |
| 1173                  | 10       | 0                | 130                               | 166            |
| 1273                  | 5        | 0                | 156                               | 80             |
| 1273                  | 10       | 0                | 171                               | 87             |
| 1273                  | 15       | 0                | 181                               | 95             |
| 1273                  | 15       | 3                | 149                               | 78             |
| 1273                  | 15       | 5                | 180                               | 95             |
| 1273                  | 15       | 7                | 151                               | 76             |
| 1273                  | 20       | 0                | 163                               | 83             |
| 1373                  | 10       | 0                | 120                               | 60             |

Photocatalyst: 0.3 g, reactant solution: distilled water (120 mL), cell: top-irradiation cell with a Pyrex

window, light source: 300 W Xe-arc lamp ( $\lambda > 300 \text{ nm}$ ).

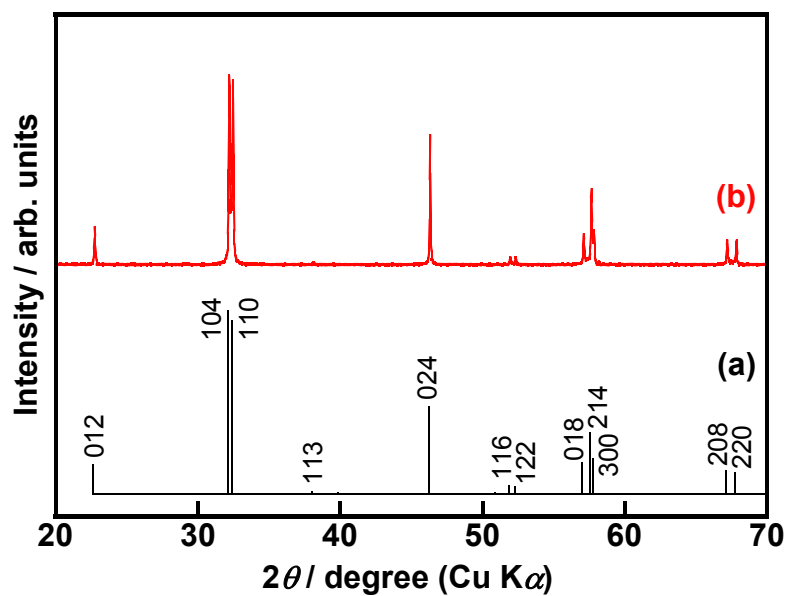

**Fig. S1** (a) PDF of trigonal AgTaO<sub>3</sub> (1-72-1383). (b) XRD pattern of AgTaO<sub>3</sub> prepared by a solid state reaction at 1273 K for 15 h without excess Ag. Peaks due to K $\alpha_2$  were removed.

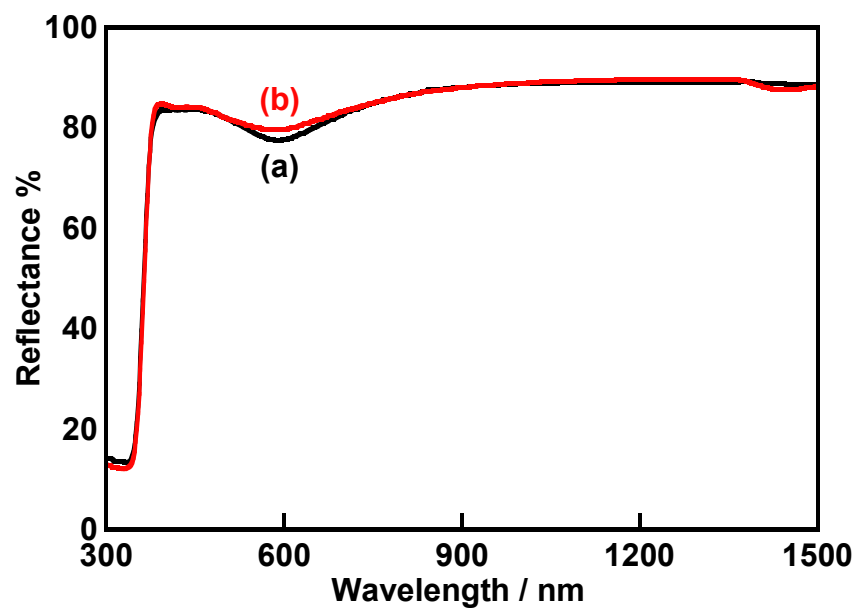

**Fig. S2** A diffuse reflectance spectrum of AgTaO<sub>3</sub> (a) before and (b) after washing with an aqueous HNO<sub>3</sub> solution. AgTaO<sub>3</sub> was prepared by a solid state reaction at 1273 K for 15 h without excess Ag.

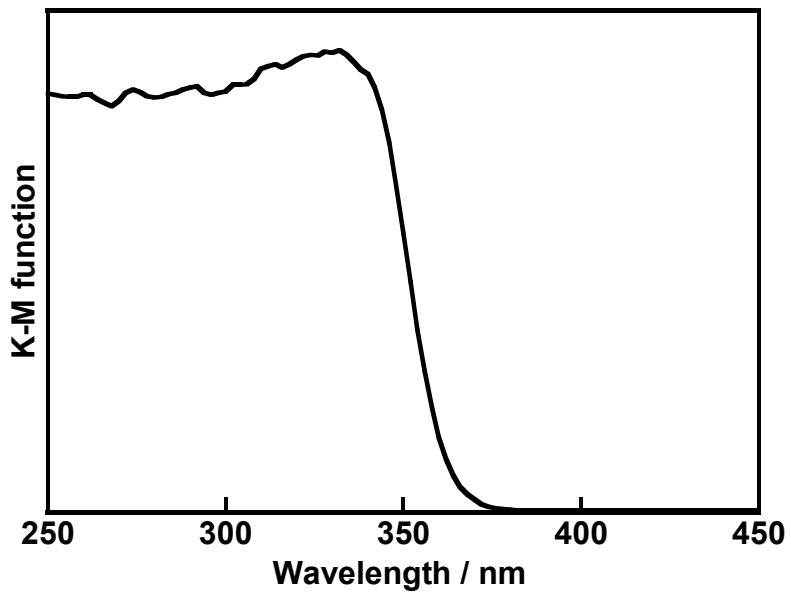

**Fig. S3** A diffuse reflectance spectrum of  $\text{AgTaO}_3$  prepared by a solid state reaction at 1273 K for 15 h without excess Ag.

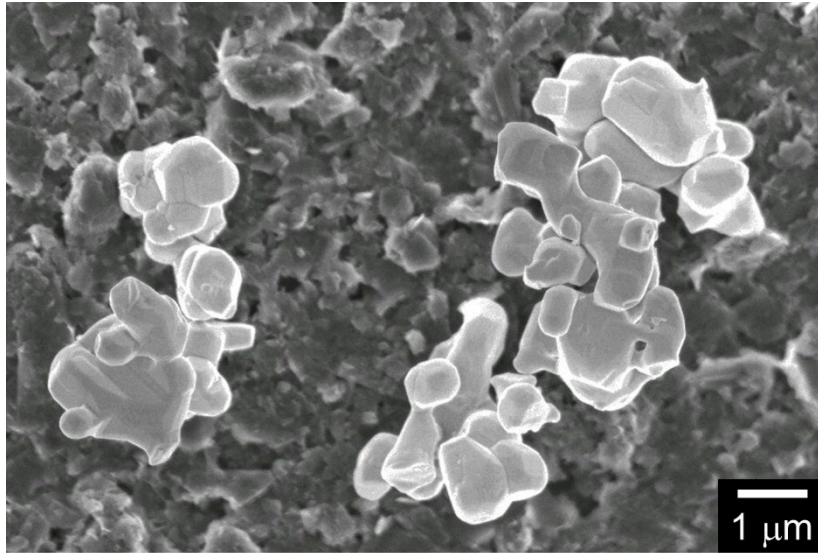

**Fig. S4** Scanning electron microscopy image of AgTaO<sub>3</sub> prepared by a solid state reaction at 1273 K for 15 h without excess Ag.

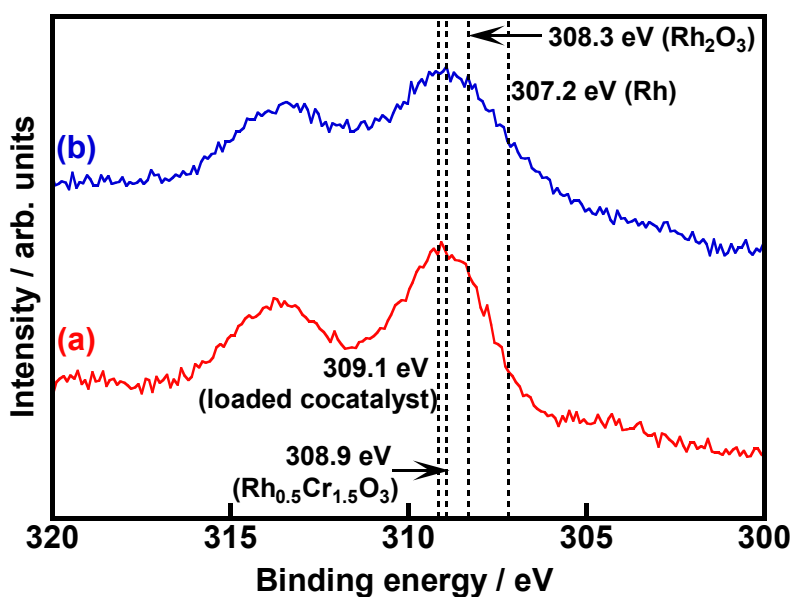

**Fig. S5** X-ray photoelectron spectra of Rh 3d for Rh<sub>0.5</sub>Cr<sub>1.5</sub>O<sub>3</sub>(0.2 wt%)/AgTaO<sub>3</sub> (a) before and (b) after photocatalytic water splitting under UV irradiation using a 300 W Xe-arc lamp. AgTaO<sub>3</sub> was synthesized by a solid state reaction at 1273 K for 15 h without excess Ag. Rh<sub>0.5</sub>Cr<sub>1.5</sub>O<sub>3</sub> was loaded by an impregnation method at 623 K for 1 h. Binding energies of all peaks were calibrated with C 1s (284.2 eV). All assigned binding energies for Rh, Rh<sub>2</sub>O<sub>3</sub>, Rh<sub>0.5</sub>Cr<sub>1.5</sub>O<sub>3</sub> and loaded cocatalyst were referred to a previous report.<sup>1,2)</sup>

#### References

- 1) C. D. Wagner, W. M. Riggs, L. E. Davis, J. F. Moulder and G. E. Muilenberg, *Perkin-Elmer Corporation, Physical Electronics Division, Eden Prairie, Minn.*, 1979.
- 2) K. Maeda, K. Teramura, D. Lu, T. Takata, N. Saito, Y. Inoue and K. Domen, *J. Phys. Chem. B*, 2006, **110**, 13753–13758.
